# Supplementary material
Source: publisher figshare collection journal article supplement (https://tandf.figshare.com/articles/dataset/_/21387459)
Supplement: Supplementary file 1 [file 1]

## SUPPLEMENTAL FILE 2

### *In Vitro* IC<sub>50</sub> (μM) Values for Drugs

| Drug           |                | Overall | Cell Line |              |           | Calculation Method |       |                        |
|----------------|----------------|---------|-----------|--------------|-----------|--------------------|-------|------------------------|
|                |                |         | Caco-2    | LLC-PK1-MDR1 | MDCK-MDR1 | ER                 | NSF   | P <sub>app,BL-AP</sub> |
| Amiodarone     | Count          | 21      | 6         | 9            | 6         | 6                  | 10    | 5                      |
|                | Geometric Mean | 11.42   | 5.90      | 13.36        | 17.45     | 7.78               | 13.05 | 13.83                  |
|                | Minimum        | 4       | 4         | 5.48         | 8.7       | 4                  | 5.48  | 4.4                    |
|                | Maximum        | 45.6    | 12.3      | 45.6         | 42.4      | 12.3               | 45.6  | 20.9                   |
| Atorvastatin   | Count          | 3       | 2         | 1            | 0         | 1                  | 2     | 0                      |
|                | Geometric Mean | 39.80   | 64.62     | 15.1         | -----     | 43.5               | 38.07 | -----                  |
|                | Minimum        | 15.1    | 43.5      | 15.1         | -----     | 43.5               | 15.10 | -----                  |
|                | Maximum        | 96      | 96        | 15.1         | -----     | 43.5               | 96    | -----                  |
| Bepridil       | Count          | 4       | 0         | 3            | 1         | 1                  | 1     | 2                      |
|                | Geometric Mean | 12.11   | -----     | 11.62        | 13.7      | 3.8                | 10.6  | 23.11                  |
|                | Minimum        | 3.8     | -----     | 3.8          | 13.7      | 3.8                | 10.6  | 13.7                   |
|                | Maximum        | 39      | -----     | 39           | 13.7      | 3.8                | 10.6  | 39                     |
| Carvedilol     | Count          | 45      | 24        | 13           | 8         | 12                 | 18    | 15                     |
|                | Geometric Mean | 3.45    | 2.55      | 4.72         | 5.10      | 1.56               | 4.96  | 4.22                   |
|                | Minimum        | 0.15    | 0.16      | 0.15         | 2         | 0.15               | 0.16  | 0.6                    |
|                | Maximum        | 40.6    | 40.6      | 32           | 10        | 25                 | 32    | 40.6                   |
| Clarithromycin | Count          | 7       | 5         | 2            | 0         | 4                  | 2     | 1                      |
|                | Geometric Mean | 20.41   | 16.14     | 36.74        | -----     | 23.81              | 16.45 | 17                     |
|                | Minimum        | 4.1     | 4.1       | 34           | -----     | 7                  | 4.1   | 17                     |
|                | Maximum        | 66      | 66        | 39.7         | -----     | 39.7               | 66    | 17                     |
| Conivaptan     | Count          | 5       | 3         | 2            | 0         | 2                  | 2     | 1                      |
|                | Geometric Mean | 23.99   | 33.63     | 14.46        | -----     | 20.37              | 39.00 | 12.6                   |
|                | Minimum        | 12.6    | 25        | 12.6         | -----     | 16.6               | 39    | 12.6                   |

|              |                |       |       |       |       |       |       |       |
|--------------|----------------|-------|-------|-------|-------|-------|-------|-------|
|              | Maximum        | 39    | 39    | 16.6  | ----- | 25    | 39    | 12.6  |
| Diltiazem    | Count          | 40    | 23    | 7     | 10    | 10    | 18    | 12    |
|              | Geometric Mean | 27.32 | 19.15 | 39.61 | 47.75 | 8.71  | 45.83 | 32.61 |
|              | Minimum        | 4.3   | 4.3   | 4.6   | 7.0   | 4.3   | 7.2   | 6.9   |
|              | Maximum        | 300   | 86.3  | 300   | 185.8 | 31.6  | 300   | 109.6 |
| Dipyridamole | Count          | 8     | 3     | 5     | 0     | 2     | 2     | 4     |
|              | Geometric Mean | 10.70 | 2.60  | 24.99 | ----- | 14.44 | 7.75  | 10.83 |
|              | Minimum        | 1.5   | 1.5   | 9.7   | ----- | 9.7   | 1.5   | 2.4   |
|              | Maximum        | 41    | 4.9   | 41    | ----- | 21.5  | 40    | 41    |
| Felodipine   | Count          | 34    | 18    | 8     | 8     | 8     | 15    | 11    |
|              | Geometric Mean | 16.13 | 13.35 | 16.70 | 23.80 | 5.76  | 21.22 | 23.44 |
|              | Minimum        | 0.9   | 0.9   | 4.22  | 6.6   | 0.9   | 4.4   | 2.7   |
|              | Maximum        | 85.8  | 68.1  | 63    | 85.8  | 39.8  | 63    | 85.8  |
| Isradipine   | Count          | 34    | 19    | 6     | 9     | 8     | 15    | 11    |
|              | Geometric Mean | 13.38 | 8.46  | 18.43 | 28.39 | 6.62  | 18.33 | 14.51 |
|              | Minimum        | 2.9   | 2.9   | 7.7   | 7.2   | 2.9   | 6.6   | 5     |
|              | Maximum        | 54.5  | 21.4  | 40.2  | 54.5  | 13    | 53.9  | 54.5  |
| Itraconazole | Count          | 12    | 7     | 4     | 1     | 5     | 2     | 5     |
|              | Geometric Mean | 1.21  | 1.01  | 1.76  | 0.95  | 0.88  | 2.19  | 1.31  |
|              | Minimum        | 0.408 | 0.408 | 0.45  | 0.95  | 0.45  | 0.797 | 0.408 |
|              | Maximum        | 6.3   | 6     | 6.3   | 0.95  | 2     | 6     | 6.3   |
| Ketoconazole | Count          | 20    | 12    | 4     | 4     | 6     | 6     | 8     |
|              | Geometric Mean | 1.42  | 1.02  | 2.50  | 2.13  | 1.07  | 1.21  | 1.97  |
|              | Minimum        | 0.1   | 0.1   | 1.2   | 1.34  | 0.42  | 0.1   | 0.99  |
|              | Maximum        | 6.4   | 4.6   | 6.4   | 3.07  | 1.89  | 4.6   | 6.4   |
| Lapatinib    | Count          | 4     | 1     | 2     | 1     | 2     | 0     | 2     |
|              | Geometric Mean | 3.06  | 2.47  | 3.15  | 3.6   | 1.92  | ----- | 4.87  |
|              | Minimum        | 1.5   | 2.47  | 1.5   | 3.6   | 1.5   | ----- | 3.6   |
|              | Maximum        | 6.6   | 2.47  | 6.6   | 3.6   | 2.47  | ----- | 6.6   |
| Linagliptin  | Count          | 3     | 2     | 1     | 0     | 2     | 0     | 1     |

|              |                |       |       |       |       |        |       |       |
|--------------|----------------|-------|-------|-------|-------|--------|-------|-------|
|              | Geometric Mean | 27.36 | 17.61 | 66    | ----- | 24.91  | ----- | 33    |
|              | Minimum        | 9.4   | 9.4   | 66    | ----- | 9.4    | ----- | 33    |
|              | Maximum        | 66    | 33    | 66    | ----- | 66     | ----- | 33    |
| Mibefradil   | Count          | 39    | 24    | 7     | 8     | 8      | 18    | 13    |
|              | Geometric Mean | 7.71  | 7.20  | 5.56  | 12.60 | 4.98   | 7.96  | 9.64  |
|              | Minimum        | 0.9   | 0.9   | 1.7   | 5.2   | 1.7    | 0.9   | 1.2   |
|              | Maximum        | 57.7  | 57.7  | 15.1  | 32.4  | 20.1   | 51.2  | 57.7  |
| Nicardipine  | Count          | 40    | 18    | 9     | 13    | 9      | 19    | 12    |
|              | Geometric Mean | 3.95  | 3.71  | 4.82  | 3.76  | 1.54   | 6.49  | 3.65  |
|              | Minimum        | 0.1   | 0.1   | 1.1   | 0.8   | 0.1    | 0.9   | 0.8   |
|              | Maximum        | 45.7  | 24    | 45.7  | 11    | 6.3    | 45.7  | 21.4  |
| Nifedipine   | Count          | 30    | 20    | 4     | 6     | 10     | 13    | 7     |
|              | Geometric Mean | 34.06 | 27.01 | 75.76 | 43.32 | 14.85  | 56.86 | 43.06 |
|              | Minimum        | 1.4   | 1.4   | 23    | 7.5   | 1.4    | 7.2   | 7.1   |
|              | Maximum        | 472   | 85.7  | 472   | 126   | 57.8   | 472   | 126   |
| Nitrendipine | Count          | 33    | 25    | 4     | 4     | 10     | 14    | 9     |
|              | Geometric Mean | 20.77 | 16.63 | 40.00 | 43.32 | 10.37  | 30.75 | 24.41 |
|              | Minimum        | 1.5   | 1.5   | 18.2  | 11.2  | 1.5    | 6.7   | 6.1   |
|              | Maximum        | 241.6 | 241.6 | 68.2  | 112.2 | 47     | 164.7 | 241.6 |
| Omeprazole   | Count          | 5     | 4     | 1     | 0     | 2      | 2     | 1     |
|              | Geometric Mean | 52.35 | 43.48 | 110   | ----- | 45.72  | 38.79 | 125   |
|              | Minimum        | 17.7  | 17.7  | 110   | ----- | 19     | 17.7  | 125   |
|              | Maximum        | 125   | 125   | 110   | ----- | 110    | 85    | 125   |
| Pantoprazole | Count          | 3     | 2     | 1     | 0     | 2      | 1     | 0     |
|              | Geometric Mean | 76.02 | 31.63 | 439   | ----- | 156.65 | 17.9  | ----- |
|              | Minimum        | 17.9  | 17.9  | 439   | ----- | 55.9   | 17.9  | ----- |
|              | Maximum        | 439   | 55.9  | 439   | ----- | 439    | 17.9  | ----- |
| Propafenone  | Count          | 4     | 2     | 2     | 0     | 1      | 3     | 0     |
|              | Geometric Mean | 27.78 | 25.42 | 30.36 | ----- | 20.3   | 30.84 | ----- |
|              | Minimum        | 6.8   | 6.8   | 20.3  | ----- | 20.3   | 6.8   | ----- |

|                |                |       |       |       |       |       |       |       |
|----------------|----------------|-------|-------|-------|-------|-------|-------|-------|
|                | Maximum        | 95    | 95    | 45.4  | ----- | 20.3  | 95    | ----- |
| Quinidine      | Count          | 66    | 40    | 13    | 14    | 19    | 23    | 24    |
|                | Geometric Mean | 6.58  | 3.80  | 10.22 | 21.75 | 2.78  | 12.36 | 7.13  |
|                | Minimum        | 0.1   | 0.1   | 1     | 1.6   | 0.13  | 0.1   | 0.16  |
|                | Maximum        | 78.2  | 39.1  | 56    | 78.2  | 43.4  | 78.2  | 73    |
| Ranolazine     | Count          | 34    | 19    | 6     | 9     | 9     | 14    | 11    |
|                | Geometric Mean | 27.57 | 20.48 | 31.63 | 47.17 | 11.26 | 48.27 | 28.15 |
|                | Minimum        | 3.5   | 3.8   | 10.7  | 3.5   | 3.5   | 11.7  | 9     |
|                | Maximum        | 198.8 | 83.2  | 130   | 198.8 | 35.5  | 198.8 | 100   |
| Ritonavir      | Count          | 10    | 6     | 3     | 1     | 3     | 4     | 3     |
|                | Geometric Mean | 8.92  | 4.12  | 28.52 | 28.2  | 5.43  | 7.14  | 19.73 |
|                | Minimum        | 1.5   | 1.5   | 18    | 28.2  | 1.5   | 3.8   | 4.5   |
|                | Maximum        | 60.5  | 10    | 60.5  | 28.2  | 21.3  | 18    | 60.5  |
| Sertraline     | Count          | 16    | 10    | 4     | 2     | 3     | 8     | 5     |
|                | Geometric Mean | 31.17 | 43.67 | 16.63 | 20.28 | 21.59 | 35.44 | 31.64 |
|                | Minimum        | 4.6   | 18.5  | 4.6   | 19.4  | 12.9  | 4.6   | 18.5  |
|                | Maximum        | 92    | 92    | 56    | 21.2  | 33.9  | 92    | 56    |
| Spironolactone | Count          | 6     | 3     | 2     | 1     | 2     | 1     | 3     |
|                | Geometric Mean | 4.17  | 1.52  | 12.94 | 8.8   | 1.59  | 2.84  | 8.99  |
|                | Minimum        | 0.377 | 0.377 | 6.7   | 8.8   | 0.377 | 2.84  | 3.308 |
|                | Maximum        | 25    | 3.308 | 25    | 8.8   | 6.7   | 2.84  | 25    |
| Telmisartan    | Count          | 42    | 28    | 8     | 6     | 12    | 16    | 14    |
|                | Geometric Mean | 7.44  | 5.54  | 20.99 | 7.42  | 5.27  | 8.77  | 8.29  |
|                | Minimum        | 1.2   | 1.2   | 12.2  | 2.1   | 2     | 1.6   | 1.2   |
|                | Maximum        | 40.7  | 31    | 40.7  | 20.7  | 20.7  | 31    | 40.7  |
| Troglitazone   | Count          | 36    | 28    | 3     | 5     | 11    | 15    | 10    |
|                | Geometric Mean | 11.43 | 12.01 | 11.22 | 8.77  | 7.39  | 15.96 | 11.19 |
|                | Minimum        | 2     | 2     | 7.4   | 6     | 2     | 6     | 4.9   |
|                | Maximum        | 53.7  | 53.7  | 15.9  | 11.4  | 21.2  | 53.7  | 26.9  |
| Valspodar      | Count          | 8     | 5     | 3     | 0     | 1     | 3     | 4     |

|           |                |        |       |      |       |       |      |        |
|-----------|----------------|--------|-------|------|-------|-------|------|--------|
| Verapamil | Geometric Mean | 0.18   | 0.19  | 0.16 | ----- | 0.38  | 0.29 | 0.10   |
|           | Minimum        | 0.0222 | 0.09  | 0.02 | ----- | 0.38  | 0.11 | 0.0222 |
|           | Maximum        | 2.1    | 2.1   | 0.48 | ----- | 0.38  | 2.1  | 0.48   |
|           | Count          | 79     | 52    | 12   | 15    | 22    | 27   | 30     |
|           | Geometric Mean | 4.59   | 2.77  | 9.15 | 15.30 | 1.62  | 8.30 | 5.77   |
|           | Minimum        | 0.063  | 0.063 | 0.57 | 1.7   | 0.063 | 0.7  | 0.17   |
|           | Maximum        | 224    | 48.3  | 224  | 44    | 26    | 57   | 224    |

Overall = all IC<sub>50</sub> data regardless of cell line or calculation method

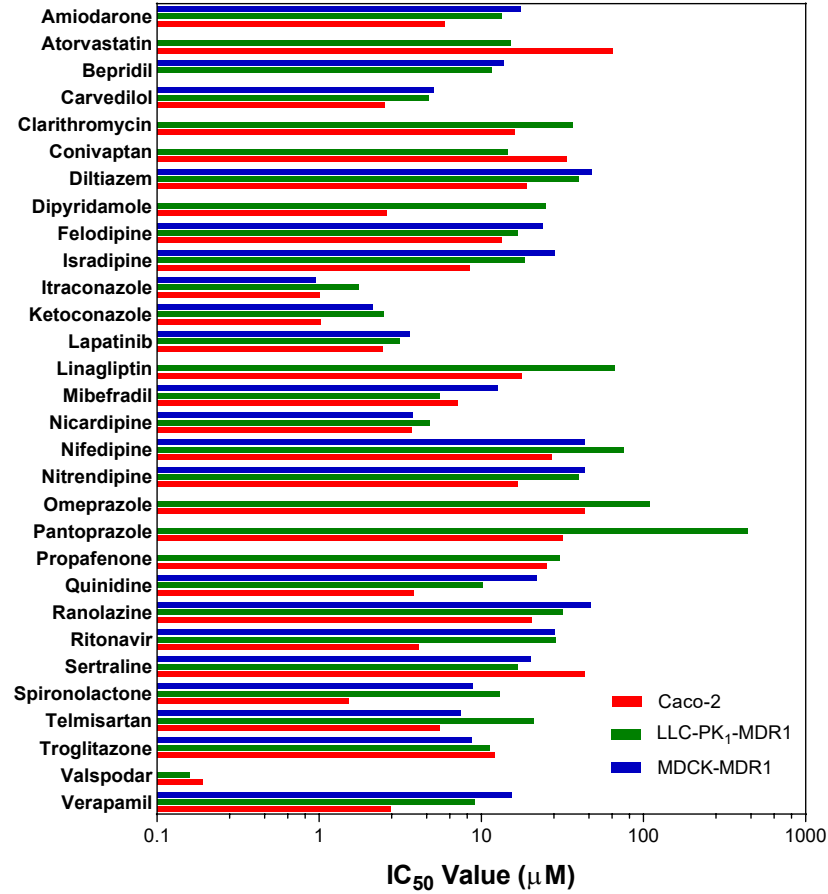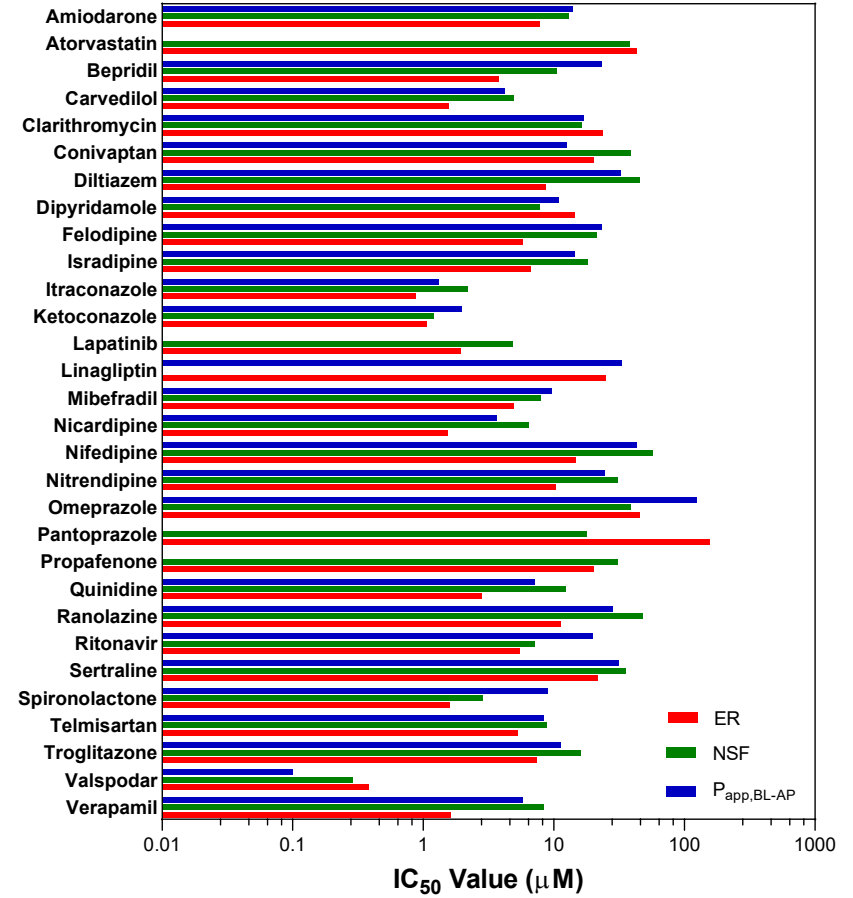

## References for IC<sub>50</sub> Values

- Alexander N, Natrillo A, Einolf H, Pelis RM, Hanna I. 2009. Comparison of two cell-based assays for examining P-glycoprotein inhibition. *Drug Metab Rev.* 41(Suppl. 3):176.
- Bachmakov I, Werner U, Endress B, Auge D, Fromm MF. 2006. Characterization of  $\beta$ -adrenoceptor antagonists as substrates and inhibitors of the drug transporter P-glycoprotein. *Fundam Clin Pharmacol.* 20(3):273-282.
- Bachmakov I, Rekersbrink S, Hofmann U, Eichelbaum M, Fromm MF. 2005. Characterisation of (R/S)-propafenone and its metabolites as substrates and inhibitors of P-glycoprotein. *Naunyn Schmiedebergs Arch Pharmacol.* 371(3):195-201.
- Bentz J, O'Connor MP, Bednarczyk D, Coleman J, Lee C, Palm J, Pak YA, Perloff ES, Reyner E, Balimane P, *et al.* 2013. Variability in P-glycoprotein inhibitory potency (IC<sub>50</sub>) using various in vitro experimental systems: implications for universal digoxin drug-drug interaction risk assessment decision criteria. *Drug Metab Dispos.* 41(7):1347-66.
- Cao J, Chen X, Liang J, Yu XQ, Xu AL, Chan E, Wei D, Huang M, Wen JY, Yu XY, *et al.* 2007. Role of P-glycoprotein in the intestinal absorption of glabridin, an active flavonoid from the root of *Glycyrrhiza glabra*. *Drug Metab Dispos.* 35(4):539-553.
- Choo EF, Leake B, Wandel C, Imamura H, Wood AJ, Wilkinson GR, Kim RB. 2000. Pharmacological inhibition of P-glycoprotein transport enhances the distribution of HIV-1 protease inhibitors into brain and testes. *Drug Metab Dispos.* 28(6):655-660.
- Collett A, Tanianis-Hughes J, Carlson GL, Harwood MD, Warhurst G. 2005. Comparison of P-glycoprotein-mediated drug-digoxin interactions in Caco-2 with human and rodent intestine: relevance to in vivo prediction. *Eur J Pharm Sci.* 26(5):386-393.
- Cook JA, Feng B, Fenner KS, Kempshall S, Liu R, Rotter C, Smith DA, Troutman MD, Ullah M, Lee CA. 2010. Refining the in vitro and in vivo critical parameters for P-glycoprotein, [I]/IC<sub>50</sub> and [I<sub>2</sub>]/IC<sub>50</sub>, that allow for the exclusion of drug candidates from clinical digoxin interaction studies. *Mol Pharm.* 7(2):398-411.
- Dickens D, Owen A, Alfirevic A, Pirmohamed M. 2013. ABCB1 single nucleotide polymorphisms (1236C>T, 2677G>T, and 3435C>T) do not affect transport activity of human P-glycoprotein. *Pharmacogenet Genomics.* 23(6):314-323.
- Eberl S, Renner B, Neubert A, Reisig M, Bachmakov I, König J, Dörje F, Mürdter TE, Ackermann A, Dormann H, *et al.* 2007. Role of p-glycoprotein inhibition for drug interactions: evidence from *in vitro* and pharmacoepidemiological studies. *Clin Pharmacokinet.* 46(12):1039-1049.
- Ekins S, Kim RB, Leake BF, Dantzig AH, Schuetz EG, Lan LB, Yasuda K, Shepard RL, Winter MA, Schuetz JD, *et al.* 2002. Three-dimensional quantitative structure-activity relationships of inhibitors of P-glycoprotein. *Mol Pharmacol.* 61(5):964-973.
- Elsby R, Gillen M, Butters C, Imisson G, Sharma P, Smith V, Surry DD. 2011. The utility of in vitro data in making accurate predictions of human P-glycoprotein-mediated drug-drug interactions: a case study for AZD5672. *Drug Metab Dispos.* 39(2):275-282.
- Elsby R, Surry DD, Smith VN, Gray AJ. 2008. Validation and application of Caco-2 assays for the *in vitro* evaluation of development candidate drugs as substrates or inhibitors of P-glycoprotein to support regulatory submissions. *Xenobiotica.* 38(7-8):1140-1164.

- Engdal S, Nilsen OG. 2008. Inhibition of P-glycoprotein in Caco-2 cells: Effects of herbal remedies frequently used by cancer patients. *Xenobiotica*. 38(6):559-573.
- Faessel HM, Burstein AH, Troutman MD, Willavize SA, Rohrbacher KD, Clark DJ. 2008. Lack of a pharmacokinetic interaction between a new smoking cessation therapy, varenicline, and digoxin in adult smokers. *Eur J Clin Pharmacol*. 64(11):1101-1109.
- Fenner KS, Troutman MD, Kempshall S, Cook JA, Ware JA, Smith DA, Lee CA. 2009. Drug-drug interactions mediated through P-glycoprotein: clinical relevance and *in vitro-in vivo* correlation using digoxin as a probe drug. *Clin Pharmacol Ther*. 85(2):173-181.
- Hellum BH, Tosse A, Hoybakk K, Thomsen M, Rohloff J, Georg Nilsen O. 2010. Potent *in vitro* inhibition of CYP3A4 and P-glycoprotein by *Rhodiola rosea*. *Planta Med*. 76(4):331-338.
- Ishiguro N, Shimizu H, Kishimoto W, Ebner T, Schaefer O. 2013. Evaluation and prediction of potential drug-drug interactions of linagliptin using in vitro cell culture methods. *Drug Metab Dispos*. 41(1):149-158.
- Kakumoto M, Takara K, Sakaeda T, Tanigawara Y, Kita T, Okumura K. 2002. MDR1-mediated interaction of digoxin with antiarrhythmic or antianginal drugs. *Biol Pharm Bull*. 25(12):1604-1607.
- Kamiyama E, Nakai D, Mikkaichi T, Okudaira N, Okazaki O. 2010. Interaction of angiotensin II type 1 receptor blockers with P-gp substrates in Caco-2 cells and hMDR1-expressing membranes. *Life Sci*. 86(1-2):52-58.
- Karibe T, Imaoka T, Abe K, Ando O. 2018. Curcumin as an in vivo selective intestinal breast cancer resistance protein inhibitor in cynomolgus monkeys. *Drug Metab Dispos*. 46(5):667-679.
- Katoh M, Nakajima M, Yamazaki H, Yokoi T. 2001. Inhibitory effects of CYP3A4 substrates and their metabolites on P-glycoprotein-mediated transport. *Eur J Pharm Sci*. 12(4):505-513. PMID: 11231118.
- Katoh M, Nakajima M, Yamazaki H, Yokoi T. 2000. Inhibitory potencies of 1,4-dihydropyridine calcium antagonists to P-glycoprotein-mediated transport: comparison with the effects on CYP3A4. *Pharm Res*. 17(10):1189-1197.
- Kawahara I, Kato Y, Suzuki H, Achira M, Ito K, Crespi CL, Sugiyama Y. 2000. Selective inhibition of human cytochrome P450 3A4 by N-[2(R)-hydroxy-1(S)-indanyl]-5-[2(S)-(1,1-dimethylethylaminocarbonyl)-4-[(furo[2,3-b]pyridin-5-yl)methyl]piperazin-1-yl]-4(S)-hydroxy-2(R)-phenylmethylpentanamide and P-glycoprotein by valspodar in gene transfectant systems. *Drug Metab Dispos*. 28(10):1238-1243.
- Keogh JP, Kunta JR. 2006. Development, validation and utility of an in vitro technique for assessment of potential clinical drug-drug interactions involving P-glycoprotein. *Eur J Pharm Sci*. 27(5):543-554.
- Kishimoto W, Ishiguro N, Ludwig-Schwellinger E, Ebner T, Schaefer O. 2014. In vitro predictability of drug-drug interaction likelihood of P-glycoprotein-mediated efflux of dabigatran etexilate based on  $[I]_2/IC_{50}$  threshold. *Drug Metab Dispos*. 42(2):257-263.
- Li X, Hu J, Wang B, Sheng L, Liu Z, Yang S, Li Y. 2014. Inhibitory effects of herbal constituents on P-glycoprotein in vitro and in vivo: herb-drug interactions mediated via P-gp. *Toxicol Appl Pharmacol*. 275(2):163-175.
- Lin J, Grimm S. 2009.  $IC_{50}$  determinations in an in vitro P-glycoprotein inhibition assay:  $P_{app}$  values vs. efflux ratios. *Drug Metab Rev*.



41(suppl. 3):176.

- Martin P, Gillen M, Millson D, Oliver S, Brealey C, Elsby R, Baluom M, Lau D, Mant T. 2015. Effects of fostamatinib on the pharmacokinetics of digoxin (a P-glycoprotein substrate): Results from in vitro and phase I clinical studies. *Clin Ther.* 37(12):2811-2822.
- Melchior DL, Sharom FJ, Evers R, Wright GE, Chu JW, Wright SE, Chu X, Yabut J. 2012. Determining P-glycoprotein-drug interactions: evaluation of reconstituted P-glycoprotein in a liposomal system and LLC-MDR1 polarized cell monolayers. *J Pharmacol Toxicol Methods.* 65(2):64-74. PMID: 22394995.
- Mikkaichi T, Yoshigae Y, Masumoto H, Imaoka T, Rozehnal V, Fischer T, Okudaira N, Izumi T. 2014. Edoxaban transport via P-glycoprotein is a key factor for the drug's disposition. *Drug Metab Dispos.* 42(4):520-528.
- Pauli-Magnus C, Rekersbrink S, Klotz U, Fromm MF. 2001. Interaction of omeprazole, lansoprazole and pantoprazole with P-glycoprotein. *Naunyn Schmiedebergs Arch Pharmacol.* 364(6):551-557.
- Pauli-Magnus C, von Richter O, Burk O, Ziegler A, Mettang T, Eichelbaum M, Fromm MF. 2000. Characterization of the major metabolites of verapamil as substrates and inhibitors of P-glycoprotein. *J Pharmacol Exp Ther.* 293(2):376-382.
- Poirier A, Cascais AC, Bader U, Portmann R, Brun ME, Walter I, Hillebrecht A, Ullah M, Funk C. 2014. Calibration of in vitro multidrug resistance protein 1 substrate and inhibition assays as a basis to support the prediction of clinically relevant interactions in vivo. *Drug Metab Dispos.* 42(9):1411-22.
- Polli JW, Humphreys JE, Harmon KA, Castellino S, O'Mara MJ, Olson KL, John-Williams LS, Koch KM, Serabjit-Singh CJ. 2008. The role of efflux and uptake transporters in [N-{3-chloro-4-[(3-fluorobenzyl)oxy]phenyl}-6-[5-({[2-(methylsulfonyl)ethyl]amino}methyl)-2-furyl]-4-quinazo- linamine (GW572016, lapatinib) disposition and drug interactions. *Drug Metab Dispos.* 36(4):695-701.
- Rautio J, Humphreys JE, Webster LO, Balakrishnan A, Keogh JP, Kunta JR, Serabjit-Singh CJ, Polli JW. 2006. In vitro P-glycoprotein inhibition assays for assessment of clinical drug interaction potential of new drug candidates: a recommendation for probe substrates. *Drug Metab Dispos.* 34(5):786-792.
- Sakaeda T, Fujino H, Komoto C, Kakumoto M, Jin JS, Iwaki K, Nishiguchi K, Nakamura T, Okamura N, Okumura K. 2006. Effects of acid and lactone forms of eight HMG-CoA reductase inhibitors on CYP-mediated metabolism and MDR1-mediated transport. *Pharm Res.* 23(3):506-512.
- Sugimoto H, Matsumoto S, Tachibana M, Niwa S, Hirabayashi H, Amano N, Moriwaki T. 2011. Establishment of *in vitro* P-glycoprotein inhibition assay and its exclusion criteria to assess the risk of drug-drug interaction at the drug discovery stage. *J Pharm Sci.* 100(9):4013-4023.
- Suzuyama N, Katoh M, Takeuchi T, Yoshitomi S, Higuchi T, Asashi S, Yokoi T. 2007. Species differences of inhibitory effects on P-glycoprotein-mediated drug transport. *J Pharm Sci.* 96(6):1609-1618.

- Takara K, Sakaeda T, Tanigawara Y, Nishiguchi K, Ohmoto N, Horinouchi M, Komada F, Ohnishi N, Yokoyama T, Okumura K. 2002. Effects of 12  $\text{Ca}^{2+}$  antagonists on multidrug resistance, MDR1-mediated transport and MDR1 mRNA expression. *Eur J Pharm Sci.* 16(3):159-165.
- Verstuyft C, Strabach S, El-Morabet H, Kerb R, Brinkmann U, Dubert L, Jaillon P, Funck-Brentano C, Trugnan G, Becquemont L. 2003. Dipyridamole enhances digoxin bioavailability via P-glycoprotein inhibition. *Clin Pharmacol Ther.* 73(1):51-60.
- Volpe DA, Hamed SS, Zhang LK. 2014. Use of different parameters and equations for calculation of  $\text{IC}_{50}$  values in efflux assays: potential sources of variability in  $\text{IC}_{50}$  determination. *AAPS J.* 16(1):172-180.
- Wandel C, Kim RB, Guengerich FP, Wood AJ. 2000. Mibefradil is a P-glycoprotein substrate and a potent inhibitor of both P-glycoprotein and CYP3A in vitro. *Drug Metab Dispos.* 28(8):895-898.
- Wandel C, Kim RB, Kajiji S, Guengerich P, Wilkinson GR, Wood AJJ. 1999. P-glycoprotein and cytochrome P-450 3A inhibition: Dissociation of inhibitory potencies. *Cancer Res.* 59(16):3944-3948.
