# Supplementary material
Source: publisher figshare collection journal article supplement (https://tandf.figshare.com/articles/dataset/_/21387459)
Supplement: Supplementary file 3 [file 1]

## SUPPLEMENTAL FILE 3

### Clinical Digoxin Drug-Drug Interactions

| Drug           | Subjects | n  | Inhibitor Dose | Digoxin Dose | AUCR | Reference |
|----------------|----------|----|----------------|--------------|------|-----------|
| Amiodarone     | patients | 10 | 400            | nl           | 1.68 | 1         |
| Atorvastatin   | healthy  | 11 | 80             | 0.25         | 1.15 | 2         |
| Bepridil       | healthy  | 23 | 300            | 0.25         | 1.21 | 3         |
| Carvedilol     | patients | 8  | 25             | 0.125-0.25   | 1.52 | 4         |
| Clarithromycin | nl       | 20 | 500            | 0.5          | 1.57 | 5         |
| Conivaptan     | healthy  | 12 | 40             | 0.25         | 1.43 | 6         |
| Diltiazem      | patients | 8  | 180            | 0.25         | 1.44 | 7         |
| Dipyridamole   | healthy  | 12 | 75             | 0.5          | 1.08 | 8         |
| Felodipine     | healthy  | 6  | 10             | 0.25         | 1.00 | 9         |
| Isradipine     | healthy  | 9  | 2.5-5          | 0.2          | 1.11 | 10        |
| Itraconazole   | healthy  | 10 | 200            | 0.5          | 1.68 | 11        |
| Ketoconazole   | healthy  | 10 | 200            | 0.5          | 1.09 | 12        |
| Lapatinib      | patients | 17 | 1500           | 0.5          | 1.63 | 13        |
| Linagliptin    | healthy  | 20 | 5              | 0.25         | 1.01 | 14        |
| Mibefradil     | healthy  | 40 | 100            | 0.375        | 1.10 | 15        |
| Nicardipine    | patients | 20 | 30             | 0.25-0.5     | 1.07 | 16        |
| Nifedipine     | healthy  | 7  | 10             | 0.25         | 1.23 | 17        |
| Nitrendipine   | healthy  | 8  | 20             | 0.25         | 1.15 | 18        |
| Omeprazole     | healthy  | 10 | 20             | 1            | 1.11 | 19        |
| Pantoprazole   | healthy  | 18 | 40             | 2            | 1.11 | 20        |
| Propafenone    | healthy  | 8  | 150            | 0.5          | 1.24 | 21        |
| Quinidine      | healthy  | 5  | 200            | nl           | 2.14 | 22        |
| Ranolazine     | healthy  | 16 | 1000           | 0.125        | 1.60 | 23        |
| Ritonavir      | nl       | 8  | 400            | 0.25         | 1.47 | 24        |
| Sertraline     | healthy  | 20 | 50             | 0.25         | 1.11 | 25        |
| Spironolactone | healthy  | 6  | 100            | 0.5-1.0      | 1.14 | 26        |
| Telmisartan    | healthy  | 12 | 120            | 0.25         | 1.22 | 27        |
| Troglitazone   | healthy  | 11 | 400            | 0.25         | 1.04 | 28        |
| Valspodar      | healthy  | 12 | 200            | 0.125        | 1.74 | 29        |
| Verapamil      | healthy  | 9  | 80             | 0.25         | 1.50 | 10        |

Dose = mg, nl = not listed

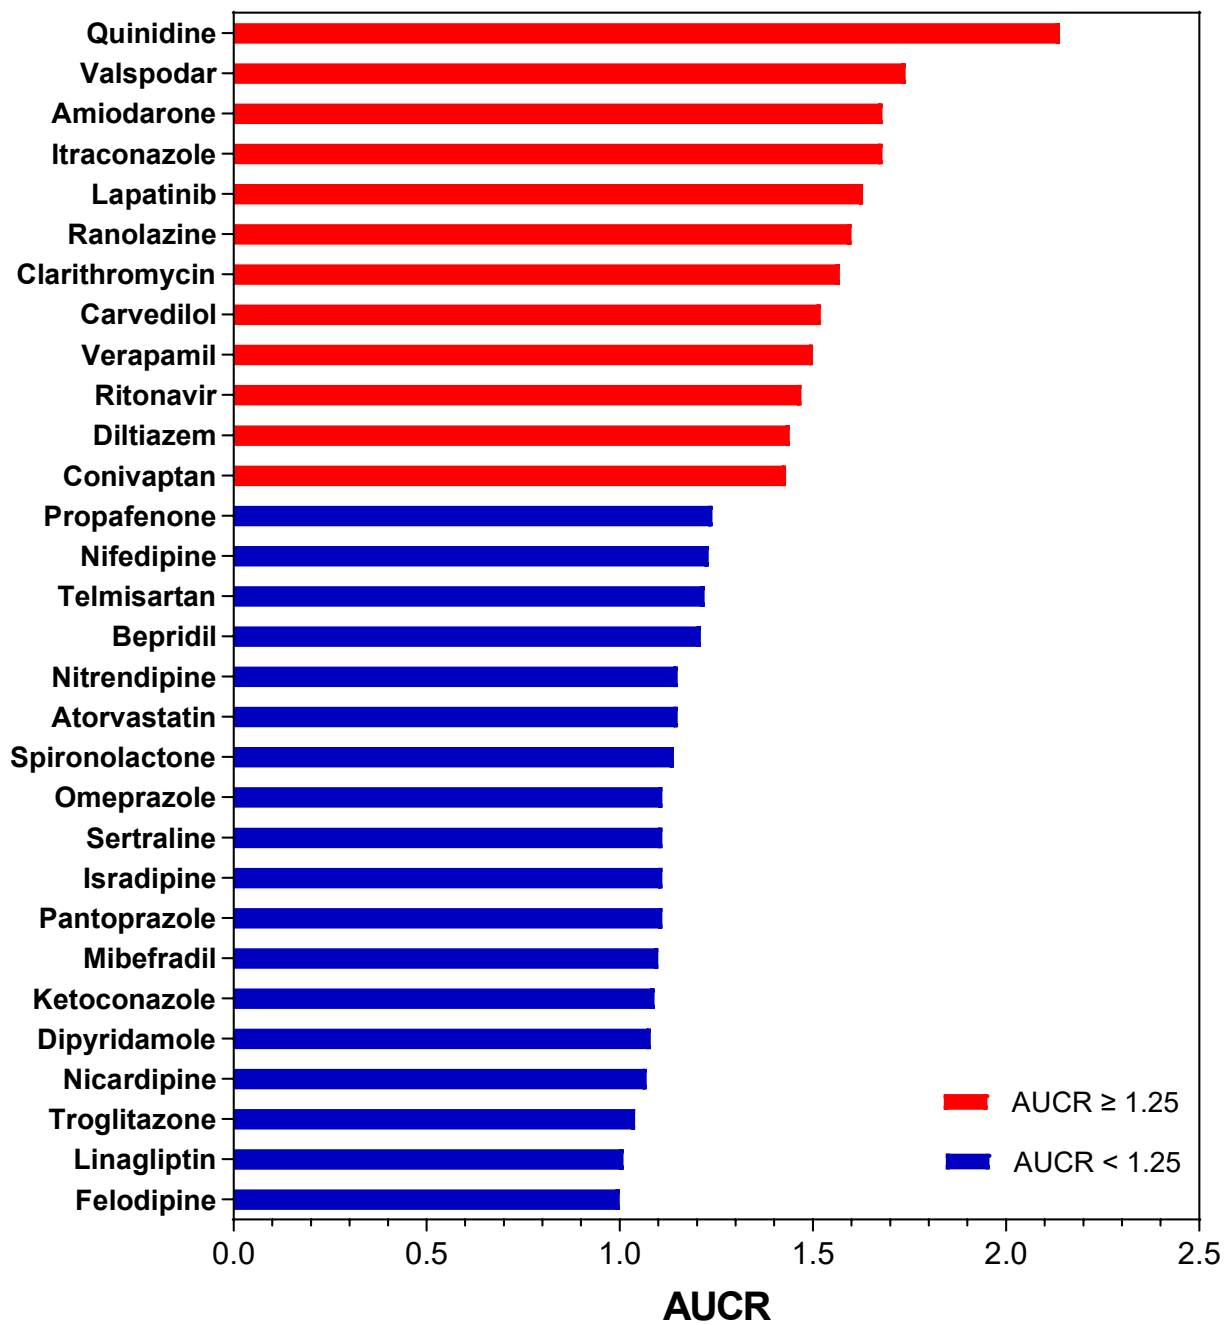

## References:

1. Robinson K, Johnston A, Walker S, Mulrow JP, McKenna WJ, Holt DW. 1989. The digoxin-amiodarone interaction. *Cardiovasc Drugs Ther.* 3(1):25-28.
2. Boyd RA, Stern RH, Stewart BH, Wu X, Reyner EL, Zegarac EA, Randinitis EJ, Whitfield L. 2000. Atorvastatin coadministration may increase digoxin concentrations by inhibition of intestinal P-glycoprotein-mediated secretion. *J Clin Pharmacol.* 40(1):91-98.
3. Doose DR, Wallen S, Nayak RK, Minn FL. 1987. Pharmacokinetic interaction of bepridil and digoxin at steady-state. *Clin Pharmacol Ther.* 41(2):204-204.
4. Souza FC, Neri JS, Marques EB, Barros RBM, Scaramello CBV. 2015. Should pharmacotherapy of digoxin be reviewed in male patients with heart failure in the case of association with carvedilol? *Int J Cardiol.* 191:4-6.
5. Gurley BJ, Swain A, Williams DK, Barone G, Battu SK. 2008. Gauging the clinical significance of P-glycoprotein-mediated herb-drug interactions: comparative effects of St. John's wort, Echinacea, clarithromycin, and rifampin on digoxin pharmacokinetics. *Mol Nutr Food Res.* 52(7):772-779.
6. Ali F, Raufi MA, Washington B, Ghali JK. 2007. Conivaptan: a dual vasopressin receptor v1a/v2 antagonist. *Cardiovasc Drug Rev.* 25(3):261-279.
7. Mahgoub AA, El-Medany AH, Abdulatif AS. 2002. A comparison between the effects of diltiazem and isosorbide dinitrate on digoxin pharmacodynamics and kinetics in the treatment of patients with chronic ischemic heart failure. *Saudi Med J.* 23(6):725-731.
8. Verstuyft C, Strabach S, El-Morabet H, Kerb R, Brinkmann U, Dubert L, Jaillon P, Funck-Brentano C, Trugnan G, Becquemont L. 2003. Dipyridamole enhances digoxin bioavailability via P-glycoprotein inhibition. *Clin Pharmacol Ther.* 73(1):51-60.
9. Snyder BD, Rowland A, Polasek TM, Miners JO, Doogue MP. 2014. Evaluation of felodipine as a potential perpetrator of pharmacokinetic drug-drug interactions. *Eur J Clin Pharmacol.* 70(9):1115-22.
10. Rodin SM, Johnson BF, Wilson J, Ritchie P, Johnson J. 1988. Comparative effects of verapamil and isradipine on steady-state digoxin kinetics. *Clin Pharmacol Ther.* 43(6):668-672.
11. Jalava KM, Partanen J, Neuvonen PJ. 1997. Itraconazole decreases renal clearance of digoxin. *Ther Drug Monit.* 19(6):609-613.
12. Larsen UL, Hyldahl Olesen L, Guldberg Nyvold C, Eriksen J, Jakobsen P, Østergaard M, Autrup H, Andersen V. 2007. Human intestinal P-glycoprotein activity estimated by the model substrate digoxin. *Scand J Clin Lab Invest.* 67(2):123-134.
13. Koch KM, Smith DA, Botbyl J, Arya N, Briley LP, Cartee L, White JH, Beyer J, Dar MM, Chung HC, *et al.* 2015. Effect of lapatinib on oral digoxin absorption in patients. *Clin Pharmacol Drug Dev.* 4(6):449-453.
14. Friedrich C, Ring A, Brand T, Sennewald R, Graefe-Mody EU, Woerle HJ. 2011. Evaluation of the pharmacokinetic interaction after multiple oral doses of linagliptin and digoxin in healthy volunteers. *Eur J Drug Metab Pharmacokinet.* 36(1):17-24.
15. Peters J, Welker HA, Bullingham R. 1999. Pharmacokinetic and pharmacodynamic aspects of concomitant mibefradil-digoxin therapy at therapeutic doses. *Eur J Drug Metab Pharmacokinet.* 24(2):133-140.
16. Debruyne D, Commeau P, Grollier G, Huret B, Scanu P, Moulin M. 1989. Nicardipine does not significantly affect serum digoxin concentrations at the steady state of patients with

- congestive heart failure. *Int J Clin Pharmacol Res.* 9(1):15-19.
17. Kirch W, Hutt HJ, Dylewicz P, Gräf KJ, Ohnhaus EE. 1986. Dose-dependence of the nifedipine-digoxin interaction? *Clin Pharmacol Ther.* 39(1):35-39.
  18. Kirch W, Logemann C, Heidemann H, Santos SR, Ohnhaus EE. 1987. Nitrendipine/digoxin interaction. *J Cardiovasc Pharmacol.* 10(Suppl 10):S74-75.
  19. Oosterhuis B, Jonkman JH, Andersson T, Zuiderwijk PBM, Jedema JN. 1991. Minor effect of multiple dose omeprazole on the pharmacokinetics of digoxin after a single oral dose. *Br J Clin Pharmacol* 32: 569-572.
  20. Hartmann M, Huber R, Bliesath H, Steinijans VW, Koch HJ, Wurst W, Kunz K. 1995. Lack of interaction between pantoprazole and digoxin at therapeutic doses in man. *Int J Clin Pharmacol Ther.* 33(9):481-485.
  21. Cardaioli P, Compostella L, De Domenico R, Papalia D, Zeppellini R, Libardoni M, Pulido E, Cucchini F. 1986. Effect of propafenone on the pharmacokinetics of digoxin administered orally: a study in healthy volunteers. *G Ital Cardiol.* 16(3):237-240.
  22. Fenster PE, Powell RJ, Hager WD, Graves PE, Conrad K, Goldman S. 1980. Onset and dose dependence of the digoxin-quinidine interaction. *Am J Cardiol.* 45 (2):413.
  23. Jerling M. 2006. Clinical pharmacokinetics of ranolazine. *Clin Pharmacokinet.* 45(5):469-491.
  24. Kirby BJ, Collier AC, Kharasch ED, Whittington D, Thummel KE, Unadkat JD. 2012. Complex drug interactions of the HIV protease inhibitors 3: effect of simultaneous or staggered dosing of digoxin and ritonavir, nelfinavir, rifampin, or bupropion. *Drug Metab Dispos.* 40(3):610-616.
  25. Rapeport WG, Coates PE, Dewland PM, Forster PL. 1996. Absence of a sertraline-mediated effect on digoxin pharmacokinetics and electrocardiographic findings. *J Clin Psychiatry.* 57(Suppl 1):16-19.
  26. Hedman A, Angelin B, Arvidsson A, Dahlqvist R. 1992. Digoxin-interactions in man: spironolactone reduces renal but not biliary digoxin clearance. *Eur J Clin Pharmacol.* 42(5):481-485.
  27. Stangier J, Su CA, Hendriks MG, van Lier JJ, Sollie FA, Oosterhuis B, Jonkman JH. 2000. The effect of telmisartan on the steady-state pharmacokinetics of digoxin in healthy male volunteers. *J Clin Pharmacol.* 40(12 Pt 1):1373-1379.
  28. Loi CM, Knowlton PW, Stern R, Randinitis EJ, Vassos AB, Koup JR, Sedman AJ. 1998. Effect of troglitazone on steady-state pharmacokinetics of digoxin. *J Clin Pharmacol.* 38(2):178-83.
  29. Kovarik JM, Rigaudy L, Guerret M, Gerbeau C, Rost KL. 1999. Longitudinal assessment of a P-glycoprotein-mediated drug interaction of valspodar on digoxin. *Clin Pharmacol Ther.* 66(4):391-400.

### Dose Information for Inhibitor Drugs

| Drug           | HDP A | Reference |
|----------------|-------|-----------|
| Amiodarone     | 400   | 1         |
| Atorvastatin   | 80    | 2         |
| Bepridil       | 400   | 3         |
| Carvedilol     | 25    | 4         |
| Clarithromycin | 500   | 5         |
| Conivaptan     | 20    | 6         |
| Diltiazem      | 120   | 7         |
| Dipyridamole   | 100   | 8         |
| Felodipine     | 10    | 9         |
| Isradipine     | 10    | 10        |
| Itraconazole   | 200   | 11        |
| Ketoconazole   | 400   | 12        |
| Lapatinib      | 1250  | 13        |
| Linagliptin    | 5     | 14        |
| Mibefradil     | 100   | 15        |
| Nicardipine    | 40    | 16        |
| Nifedipine     | 30    | 17        |
| Nitrendipine   | 40    | 18        |
| Omeprazole     | 40    | 19        |
| Pantoprazole   | 40    | 20        |
| Propafenone    | 300   | 21        |
| Quinidine      | 300   | 22        |
| Ranolazine     | 1000  | 23        |
| Ritonavir      | 600   | 24        |
| Sertraline     | 200   | 25        |
| Spironolactone | 100   | 26        |
| Telmisartan    | 80    | 27        |
| Troglitazone   | 600   | 28        |
| Valspodar      | 600   | 29        |
| Verapamil      | 120   | 30        |

HDP A = highest dose per administration (mg)

## References:

1. CORDARONE® (amiodarone) tablets, for oral use. Wyeth Pharmaceuticals Inc. Philadelphia, PA. Revised 10/2018.
2. LIPITOR® (atorvastatin calcium) tablets, for oral use. Parke-Davis. New York, NY. Revised. 11/2020.
3. [www.rxlist.com/vascor-drug.htm](http://www.rxlist.com/vascor-drug.htm)
4. COREG (carvedilol) tablets for oral use. GlaxoSmithKline. Research Triangle Park, NC. Revised 09/2017.
5. BIAXIN® Filmtab® (clarithromycin) tablets, for oral use. AbbVie Inc., North Chicago, IL. Revised 09/2019.
6. VAPRISOL® (conivaptan hydrochloride) injection, for intravenous use. Cumberland Pharmaceuticals Inc. Nashville TN. Revised 10/2016.
7. CARDIZEM® (diltiazem hydrochloride) tablets. Bausch Health Companies Inc. Bridgewater, NJ. Revised 06/2020.
8. Persantine® (dipyridamole USP) tablets. Boehringer Ingelheim. Revised 12/2019.
9. PLENDIL® (felodipine) extended-release tablets. AstraZeneca LP. Wilmington, DE. Revised 10/2012.
10. ISRADIPINE- isradipine capsule. Actavis Pharma, Inc. Parsippany, NJ. Revised 06/2017.
11. SPORANOX® (itraconazole) capsules. Janssen Pharmaceuticals, Inc. Titusville, NJ. Revised 03/2019.
12. NIZORAL® (ketoconazole) tablets. Janssen Pharmaceuticals, Inc. Titusville, NJ. Revised 02/2014.
13. TYKERB® (lapatinib) tablets, for oral use. Novartis Pharmaceuticals Corporation East Hanover, NJ. Revised 12/2018.
14. TRADJENTA® (linagliptin tablets), for oral use. Boehringer Ingelheim Pharmaceuticals, Inc. Ridgefield, CT. Revised 03/2020.
15. Brogden RN, Markham A. 1997. Mibefradil. A review of its pharmacodynamic and pharmacokinetic properties, and therapeutic efficacy in the management of hypertension and angina pectoris. *Drugs*. 54(5):774-793.
16. CARDENE® (nicardipine hydrochloride) capsules. Roche Laboratories Inc. Nutley. NJ. Revised 08/2016.
17. PROCARDIA® (nifedipine) capsules. Pfizer Labs. New York, NY. Revised 01/2015.
18. Goa KL, Sorkin EM. Nitrendipine: a review of its pharmacodynamic and pharmacokinetic properties, and therapeutic efficacy in the treatment of hypertension. *Drugs*. 1987; 33(2):123-155.
19. PRILOSEC® (omeprazole) delayed-release capsules. AstraZeneca Pharmaceuticals LP, Wilmington, DE. Revised 12/2016.
20. PROTONIX® (pantoprazole sodium) delayed-release tablets, for oral use. Wyeth Pharmaceuticals LLC. Philadelphia, PA. Revised 11/2020.
21. RYTHMOL(propafenone hydrochloride tablets), for oral use. GlaxoSmithKline. Research Triangle Park, NC. Revised 11/2018.
22. Quinidex Extentabs® tablets. (quinidine sulfate extended release tablets, USP). A.H. Robins Company. Richmond, VA. Revised 09/2000.
23. RANEXA® (ranolazine) extended-release tablets, for oral use. Gilead Sciences, Inc. Foster City, CA. Revised 10/2019.

24. NORVIR (ritonavir) tablets, for oral use. AbbVie Inc., North Chicago, IL. Revised 10/2020.
25. ZOLOFT (sertraline hydrochloride) tablets, for oral use. Roerig. New York, NY. Revised 12/2017.
26. ALDACTONE® (spironolactone) tablets for oral use. G.D. Searle LLC. New York, NY. Revised 06/2020.
27. MICARDIS® (telmisartan) tablets, for oral use. Boehringer Ingelheim Pharmaceuticals, Inc. Ridgefield, CT. Revised 02/2018.
28. REZULIN® (troglitazone) tablets. Parke-Davis. Morris Plains, NJ. Revised 06/1999.
29. Mueller EA, Kovarik JM, Üresin Y, Preisig-Flückiger SS, Hensel S, Lücker PW, Holt B. 1997. Optimizing the absorption of valspodar, a P-glycoprotein modulator, Part I: Selecting an oral formulation and exploring its clinical pharmacokinetics/dynamics. J Clin Pharmacol. 37(11):1001-10008.
30. CALAN® verapamil hydrochloride tablets. G.D. Searle LLC. New York, NY. Revised 09/2017.

Drug product labels from Drugs@FDA [<https://www.accessdata.fda.gov/scripts/cder/daf/>]
